# Supplementary material for: A Novel Biosensor and Algorithm to Predict Vitamin D Status by Measuring Skin Impedance
Source: MDPI journal article supplement (doi:10.3390/s21238118), 2021-12-04
Supplement: s1 [file s1]

## Supplementary Data S1

**Table S1. Participant data characteristics (InBody)**

| Variable                                     | Unit              | Frequency analysis/Descriptive statistics (N=26) |
|----------------------------------------------|-------------------|--------------------------------------------------|
| <b>Basic Information</b>                     |                   |                                                  |
| Age                                          | yr                | 28.73 ± 9.28                                     |
| Gender                                       |                   | male: 14(53.8%); female: 12(46.2%)               |
| <b>Obesity analysis</b>                      |                   |                                                  |
| Body mass index                              | Kg/m <sup>2</sup> | 21.84 ± 2.14                                     |
| Body fat percentage                          | %                 | 25.55 ± 8.05                                     |
| <b>Body composition analysis</b>             |                   |                                                  |
| Body water                                   | L                 | 34.07 ± 7.3                                      |
| Protein                                      | Kg                | 9.18 ± 2.05                                      |
| Minerals                                     | Kg                | 3.23 ± 0.61                                      |
| Body fat                                     | Kg                | 15.59 ± 4.72                                     |
| Muscle mass                                  | Kg                | 43.79 ± 9.46                                     |
| Lean body mass                               | Kg                | 46.47 ± 9.94                                     |
| <b>Skeletal muscle/Fat analysis</b>          |                   |                                                  |
| Skeletal muscle mass                         | Kg                | 25.7 ± 6.14                                      |
| <b>Muscle analysis by region</b>             |                   |                                                  |
| Right arm                                    | Kg                | 2.37 ± 0.73                                      |
| Right arm                                    | %                 | 90.06 ± 9.17                                     |
| Left arm                                     | Kg                | 2.34 ± 0.74                                      |
| Left arm                                     | %                 | 89.04 ± 9.67                                     |
| Body                                         | Kg                | 20.68 ± 4.46                                     |
| Body                                         | %                 | 95.19 ± 5.37                                     |
| Right leg                                    | Kg                | 7.34 ± 1.65                                      |
| Right leg                                    | %                 | 96.84 ± 6.95                                     |
| Left leg                                     | Kg                | 7.34 ± 1.69                                      |
| Left leg                                     | %                 | 96.59 ± 6.74                                     |
| <b>Analysis of extracellular water ratio</b> |                   |                                                  |
| Extracellular water ratio                    |                   | 0.38 ± 0.01                                      |
| <b>Body fat analysis by region</b>           |                   |                                                  |
| Right arm                                    | Kg                | 0.97 ± 0.4                                       |
| Left arm                                     | Kg                | 0.99 ± 0.41                                      |
| Body                                         | Kg                | 7.73 ± 2.68                                      |
| Right leg                                    | Kg                | 2.43 ± 0.64                                      |
| Left leg                                     | Kg                | 2.42 ± 0.64                                      |
| <b>Other items</b>                           |                   |                                                  |
| Intracellular water                          | L                 | 21.24 ± 4.7                                      |
| Extracellular water                          | L                 | 12.83 ± 2.61                                     |
| Basal metabolic rate                         | Kcal              | 1373.81 ± 214.73                                 |
| Abdominal fat percentage                     |                   | 0.87 ± 0.06                                      |
| Body cell mass                               | Kg                | 30.42 ± 6.72                                     |

## Supplementary Data S2

**Table S2. Characteristics of participant's health checkup data**

| Variable                        | Frequency analysis/Descriptive statistics (N=26)   | Variable                          | Frequency analysis/Descriptive statistics (N=26) |
|---------------------------------|----------------------------------------------------|-----------------------------------|--------------------------------------------------|
| <b>Basic Information</b>        |                                                    | <b>Sugar test</b>                 |                                                  |
| Age                             | 28.73 ± 9.28                                       | Blood sugar (before meals)        | 89.04 ± 10.01                                    |
| Gender                          | male: 14(53.8%); female: 12(46.2%)                 | HbA1c-NGSP                        | 5.24 ± 0.43                                      |
| Blood type (Rh+)                | A: 7(26.9%); AB: 2(7.7%); B: 8(30.8%); O: 9(34.6%) | yolk                              | Negative: 25(96.2%)                              |
| <b>Body measurements</b>        |                                                    | Insulin, fasting 1 time           | 9.56 ± 3.67                                      |
| Waist circumference             | 80.03 ± 7.31                                       | HOMA Ratio                        | 2.06 ± 0.92                                      |
| Body mass index                 | 21.48 ± 2.17                                       | <b>kidney/Pancreas/Other</b>      |                                                  |
| <b>Blood pressure</b>           |                                                    | BUN                               | 12.42 ± 2.67                                     |
| Blood pressure (highest)        | 119.73 ± 13.59                                     | Uric Acid                         | 5.41 ± 1.12                                      |
| Blood pressure (lowest)         | 73.46 ± 10.13                                      | Na                                | 138.81 ± 2.05                                    |
| Pulse                           | 76.92 ± 9.63                                       | K                                 | 4.59 ± 1.06                                      |
| <b>Eye examination</b>          |                                                    | P                                 | 3.79 ± 0.46                                      |
| Corrected visual acuity (left)  | 1.09 ± 0.25                                        | Creatinine                        | 0.78 ± 0.18                                      |
| Corrected visual acuity (right) | 1.06 ± 0.25                                        | Amylase                           | 67.58 ± 21.05                                    |
| Naked eyesight (left)           | 0.91 ± 0.44                                        | Ca                                | 9.53 ± 0.25                                      |
| Naked eyesight (right)          | 0.96 ± 0.43                                        | CKD-EPI                           | 115.75 ± 11.24                                   |
| Intraocular pressure (left)     | 15.32 ± 2.94                                       | MDRD                              | 108.13 ± 17.21                                   |
| Intraocular pressure (right)    | 15.84 ± 2.87                                       | <b>Tumor marker test (female)</b> |                                                  |
| Fundus examination              | Normal Limit: 20(76.9%)                            | AFP(EIA)                          | 1.72 ± 0.61                                      |
| <b>hearing test</b>             |                                                    | CEA                               | 0.98 ± 0.58                                      |
| Airway Hearing 500Hz (Left)     | 11.73 ± 5.47                                       | CA19-9                            | 15.36 ± 28.13                                    |
| Airway Hearing 500Hz (Right)    | 10.38 ± 1.96                                       | CA-125                            | 15.86 ± 5.78                                     |
| Airway Hearing 1000Hz (Left)    | 11.35 ± 4.14                                       | HE4                               | 29.23 ± 4.73                                     |
| Airway Hearing 1000Hz (Right)   | 11.15 ± 4.96                                       | ROMA, premenopausal               | 2.28 ± 0.86                                      |
| Airway Hearing 2000Hz (Left)    | 12.12 ± 6.19                                       | ROMA, postmenopausal              | 7.13 ± 2.4                                       |
| Airway Hearing                  | 11.65 ± 6.32                                       | <b>Tumor marker test (male)</b>   |                                                  |

|                           |                |                                  |                                                |
|---------------------------|----------------|----------------------------------|------------------------------------------------|
| 2000Hz (Right)            |                |                                  |                                                |
| Airway Hearing            | 14.04 ± 11.23  | AFP(EIA)                         | 2.32 ± 1.35                                    |
| 4000Hz (Left)             |                | CEA                              | 2 ± 1.1                                        |
| Airway Hearing            | 15.58 ± 16.57  | CA19-9                           | 8.69 ± 4.93                                    |
| 4000Hz (Right)            |                | PSA                              | 1.07 ± 0.84                                    |
| Airway Hearing            | 16.73 ± 16.79  |                                  |                                                |
| 8000Hz (Left)             |                |                                  |                                                |
| Airway Hearing            | 16.54 ± 14.88  |                                  |                                                |
| 8000Hz (Right)            |                |                                  |                                                |
| <b>lung function test</b> |                | <b>hepatitis test</b>            |                                                |
| FVC                       | 4.1 ± 0.86     | HBs-Ag                           | Negative: 26(100%)                             |
| FVC(%)                    | 90.5 ± 10.66   | HBs-Ab                           | Negative: 13(50%); Positive: 13(50%)           |
| FEV1                      | 3.47 ± 0.75    | Anti-HBc(Total)                  | Negative: 26(100%)                             |
| FEV1(%)                   | 95.92 ± 10.73  | Anti-HCV(EIA)                    | Negative: 26(100%)                             |
| PEF                       | 7.33 ± 1.89    | Anti-HAV(Total)                  | Negative: 15(57.7%); Positive: 11(42.3%)       |
| FEV1/FCV                  | 85.69 ± 7.57   |                                  |                                                |
| PEF(%)                    | 90.57 ± 16.69  | <b>immune serum test</b>         |                                                |
| <b>general blood test</b> |                | AIDS                             | Negative: 26(100%)                             |
| HB                        | 14.63 ± 1.44   | TPHA                             | Negative: 26(100%)                             |
| HCT                       | 42.96 ± 3.82   | Rheumatoid factor (quantitative) | <10: 26(100%)                                  |
| WBC                       | 6.12 ± 1.46    | C-reactive protein               | 0.1 ± 0.03                                     |
| RBC                       | 4.8 ± 0.43     | Syphilis test (qualitative)      | Negative: 26(100%)                             |
| Platelet                  | 280.65 ± 54.84 |                                  |                                                |
| MCV                       | 89.57 ± 2.63   | <b>thyroid</b>                   |                                                |
| MCH                       | 30.47 ± 1.23   | Free T4                          | 1.41 ± 0.21                                    |
| MCHC                      | 34.03 ± 0.92   | TSH                              | 2.21 ± 1.42                                    |
| RDW                       | 12.06 ± 0.41   | Thyroid hormone T3               | 1.09 ± 0.19                                    |
| PDW                       | 11.12 ± 1.27   |                                  |                                                |
| ESR                       | 10.69 ± 7.78   | <b>Stool test</b>                |                                                |
| MPV                       | 9.95 ± 0.74    | Protozoa                         | Negative: 18 (69.2%)                           |
| <b>leukocyte</b>          |                | Worm                             | Negative: 18(69.2%)                            |
| Neutrophil                | 54.5 ± 6.63    | Stool occult blood test          | 5.06 ± 12.14                                   |
| Lymphocyte                | 33.91 ± 5.73   | Whipworm                         | -                                              |
| Mono                      | 8.13 ± 1.61    | Fluke                            | Negative: 18(69.2%)                            |
| Eoso                      | 2.85 ± 1.78    |                                  |                                                |
| Baso                      | 0.61 ± 0.27    | <b>urinalysis</b>                |                                                |
| <b>Lipid test</b>         |                | Yolk                             | Negative: 24(92.3%)                            |
| Total cholesterol         | 178.31 ± 39.16 | Protein                          | Negative: 15(57.7%); Weakly positive: 7(26.9%) |
|                           |                | Occult Blood                     | Negative: 23(88.5%); Weakly positive: 1(3.8%)  |
|                           |                | pH                               | 5.61 ± 0.5                                     |
|                           |                | LEUKOCYTE                        | Negative: 23(88.5%); Positive: 1(3.8%)         |

|                            |                |                          |                                                                         |
|----------------------------|----------------|--------------------------|-------------------------------------------------------------------------|
| HDL cholesterol            | 63.54 ± 13.3   | Uro-Bilinogen            | Negative: 22(84.6%); Weakly positive: 2(7.7%)                           |
| LDL cholesterol            | 92.04 ± 32.3   | Bilirubin                | Negative: 20(76.9%); Positive: 4(15.4%)                                 |
| TG                         | 103.04 ± 48.58 | Nitrite                  | Negative: 24(92.3%)                                                     |
| <b>liver function test</b> |                | Ketone                   | Negative: 17(65.4%); Weakly positive: 5(19.2%); Positive: 2(7.7%)       |
| AST                        | 18.88 ± 6.02   | S.G                      | 1.03 ± 0.005                                                            |
| ALT                        | 17.77 ± 10.47  | Urine color              | Amber: 12(46.2%); Brown: 11(42.3%); Pale Yellow: 1(3.8%)                |
| r-GPT                      | 23.5 ± 17.35   | Bacteria                 | Negative: 15(57.7%); A few: 5(19.2%); Moderate: 3(11.5%); Many: 1(3.8%) |
| Albumin                    | 4.78 ± 0.17    | <b>Urine sediment</b>    |                                                                         |
| Total Protein              | 7.29 ± 0.28    | RBC                      | 0~2: 24(92.3%)                                                          |
| Total Bilirubin            | 0.7 ± 0.38     | WBC                      | 0~2: 21(80.8%); 3~5: 2(7.7%); 11~20: 1(3.8%)                            |
| Direct Bilirubin           | 0.26 ± 0.11    | Epithelial cells         | 0~2: 16(61.5%); 3~5: 5(19.2%); 6~10: 3(11.5%)                           |
| ALP                        | 57.46 ± 23.06  | <b>Other blood tests</b> |                                                                         |
| LDH                        | 361.23 ± 58.29 | Vitamin D                | 30.03 ± 13.14                                                           |
| A/G ratio                  | 1.93 ± 0.27    |                          |                                                                         |

### Supplementary Data S3

**Table S3. Variables considered after normality test (lnBody)**

| variable                           | Unit              | descriptive statistics (N=26) | Significance Probability ( <i>p</i> -value) |
|------------------------------------|-------------------|-------------------------------|---------------------------------------------|
| <b>Obesity analysis</b>            |                   |                               |                                             |
| Body mass index                    | Kg/m <sup>2</sup> | 21.84 ± 2.14                  | .658                                        |
| Body fat percentage                | %                 | 25.55 ± 8.05                  | .083                                        |
| <b>Body composition analysis</b>   |                   |                               |                                             |
| Minerals                           | Kg                | 3.23 ± 0.61                   | .315                                        |
| Body fat                           | Kg                | 15.59 ± 4.72                  | .615                                        |
| Lean body mass                     | Kg                | 46.47 ± 9.94                  | .053                                        |
| <b>Muscle analysis by region</b>   |                   |                               |                                             |
| Right arm                          | %                 | 90.06 ± 9.17                  | .446                                        |
| Left arm                           | %                 | 89.04 ± 9.67                  | .895                                        |
| Log_ torso                         | %                 | 4.55 ± 0.06                   | .057                                        |
| Log_right leg                      | %                 | 4.57 ± 0.07                   | .070                                        |
| Left leg                           | %                 | 96.59 ± 6.74                  | .116                                        |
| <b>Analysis of extracellular</b>   |                   |                               |                                             |
| <b>Water ratio</b>                 |                   |                               |                                             |
| Extracellular water<br>secretion   |                   | 0.38 ± 0.01                   | .923                                        |
| <b>Body fat analysis by region</b> |                   |                               |                                             |
| Right arm                          | Kg                | 0.97 ± 0.4                    | .470                                        |
| Left arm                           | Kg                | 0.99 ± 0.41                   | .262                                        |
| Body                               | Kg                | 7.73 ± 2.68                   | .917                                        |
| Right leg                          | Kg                | 2.43 ± 0.64                   | .401                                        |
| Left leg                           | Kg                | 2.42 ± 0.64                   | .356                                        |
| <b>Other items</b>                 |                   |                               |                                             |
| Extracellular water                | L                 | 12.83 ± 2.61                  | .067                                        |
| Basal metabolic rate               | Kcal              | 1373.81 ± 214.73              | .051                                        |
| Abdominal fat percentage           |                   | 0.87 ± 0.06                   | .220                                        |
